# Supplementary material
Source: MDPI journal article supplement (https://www.mdpi.com/1424-2818/13/10/484)

## Online supplementary material

**Růžicková and Elek:** Unequivocal differences in predation pressure on large carabid beetles between forestry treatments

**Figure S1:** 3D model of *Carabus coriaceus* decoy used for 3D printing. The original file in .stl format (205 MB) can be provided upon request.

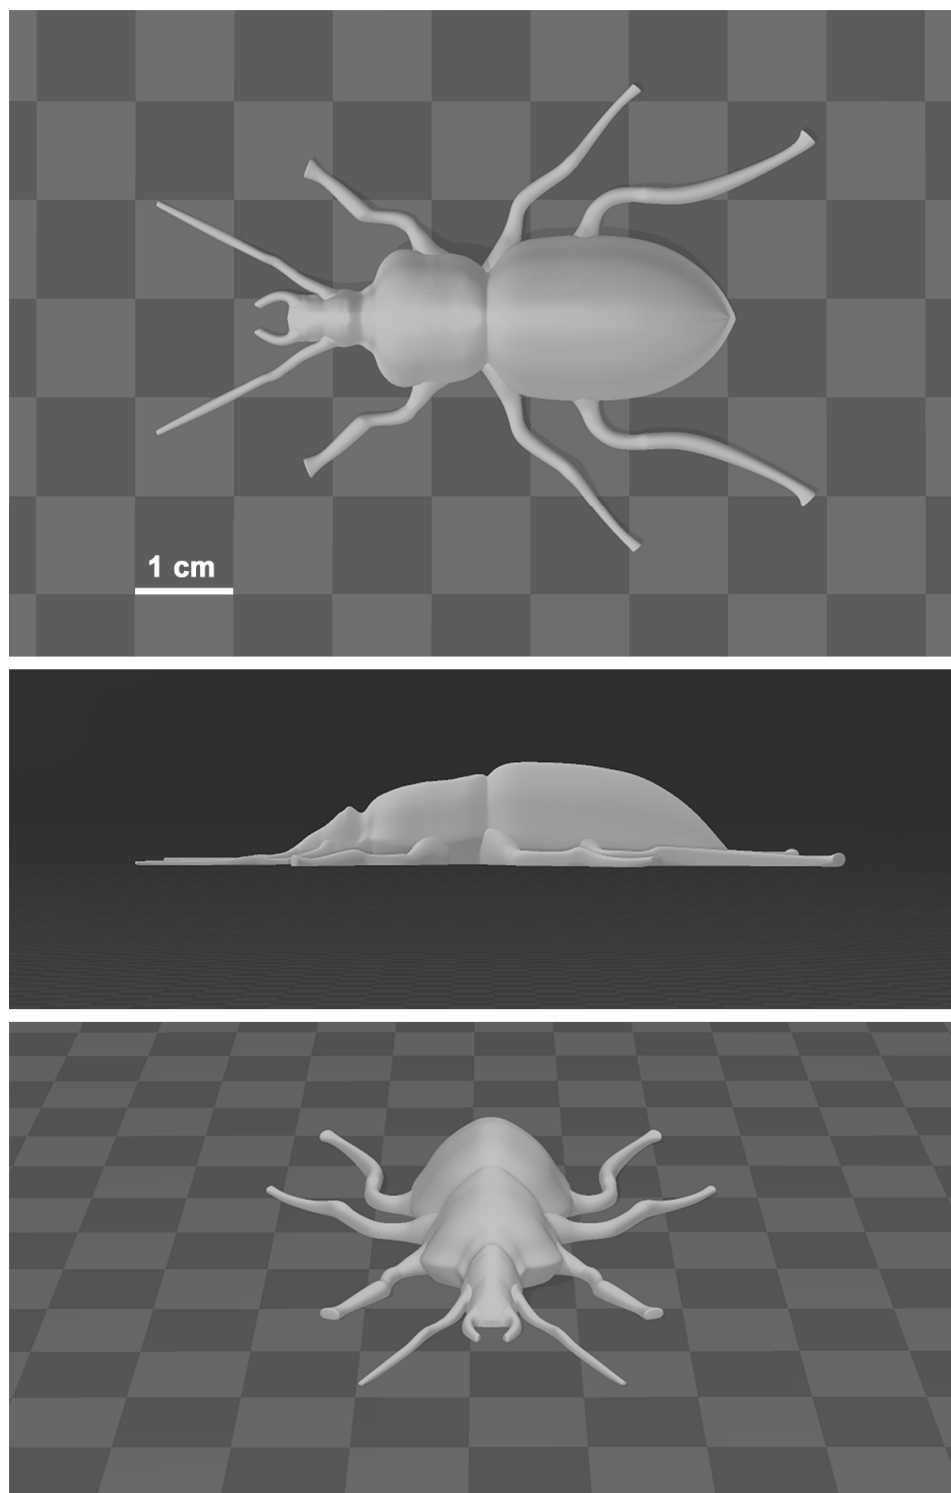

**Figure S2:** The overview of the Spearman's rank correlation test for exploring the relationship between microhabitat features: cover of bare soil, leaf litter, herbal layer, shrubbery and the presence of tree.

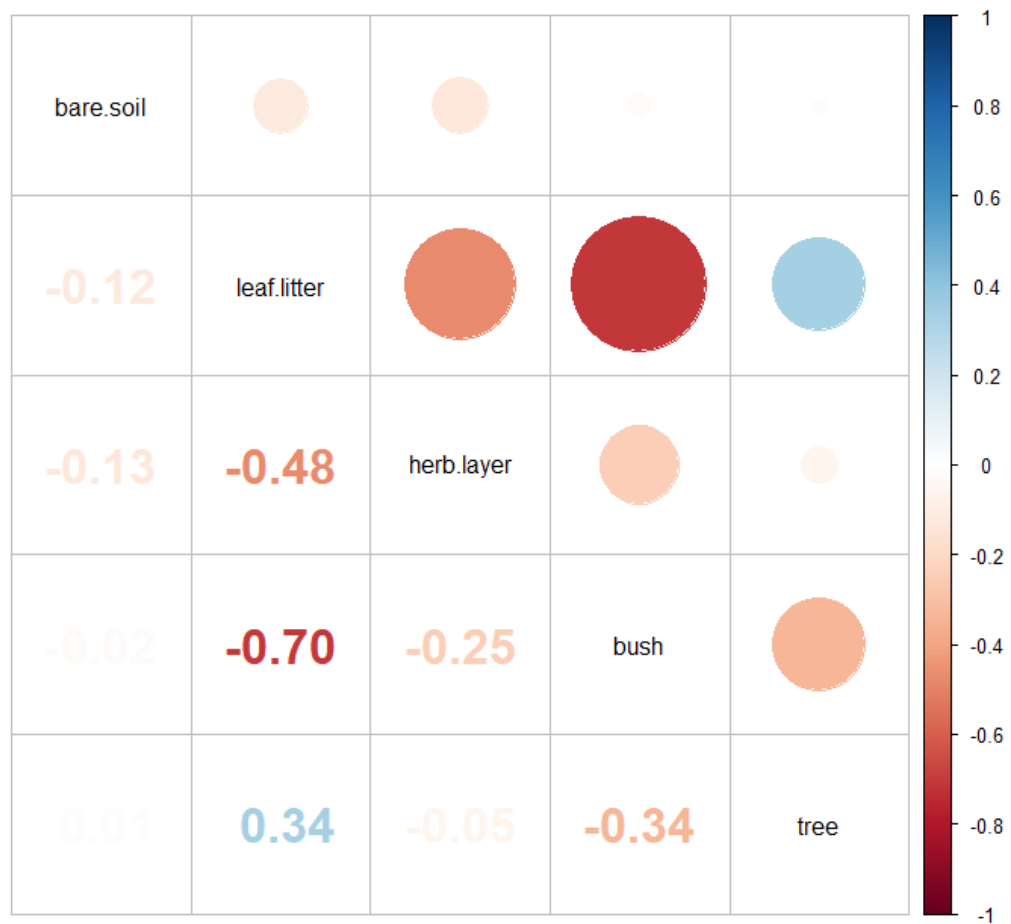

Supplement: s1 [file s1]
